# Supplementary material
Source: PubMed Central journal article supplement (PMC4361009)
Supplement: Supp_Fig1.pdf [file Supp_Fig1.pdf]

## Supplementary Data

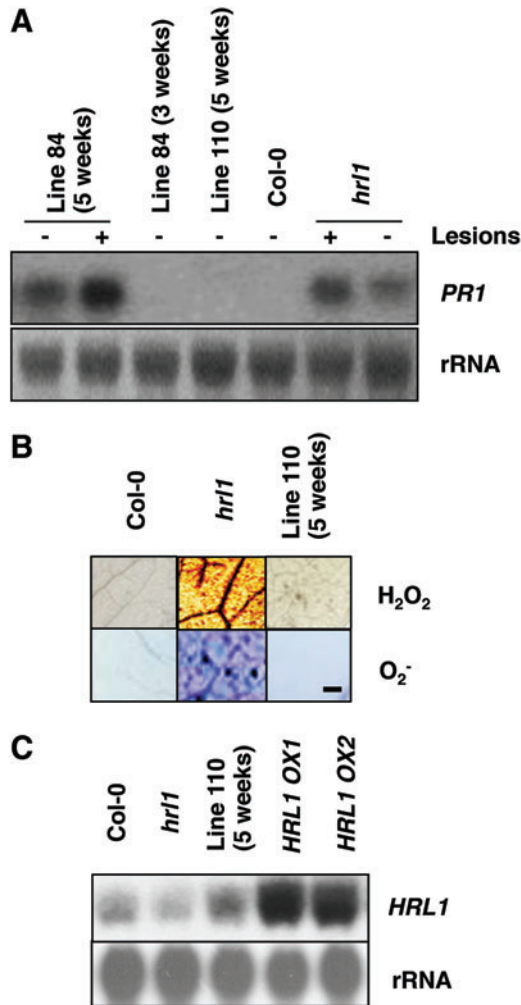

**SUPPLEMENTARY FIG. S1. Complementation of the *hrl1* mutant phenotype.** (A) *PR1* expression analysis in line 84 and 110. *PR1* expression was analyzed by northern gel blot analysis. RNA was isolated from leaves of plants of indicated genotypes of the indicated age. Blot was hybridized with the *PR1* probe. Methylene blue stained membrane is showing rRNA as a loading control. The entire experiment was repeated at least twice more with plants grown at different times, and similar results were obtained. (B) Staining for hydrogen peroxide (DAB staining) and superoxide (NBT staining) levels in Col-0, *hrl1*, *HRL1*, and line 110. The entire experiment was repeated at least twice more with plants grown at different times, and similar results were obtained. (C) *HRL1* expression analysis in Col-0, *hrl1*, line 110, and *HRL1 OX* lines. *HRL1* expression was analyzed by northern gel blot analysis. RNA was isolated from leaves of plants of indicated genotypes of the indicated age. Blot was hybridized with the *HRL1* probe. Methylene blue stained membrane is showing rRNA as a loading control. The entire experiment was repeated at least twice more with plants grown at different times, and similar results were obtained.
