# Supplementary material
Source: PubMed Central journal article supplement (PMC4361009)
Supplement: Supp_Fig2.pdf [file Supp_Fig2.pdf]

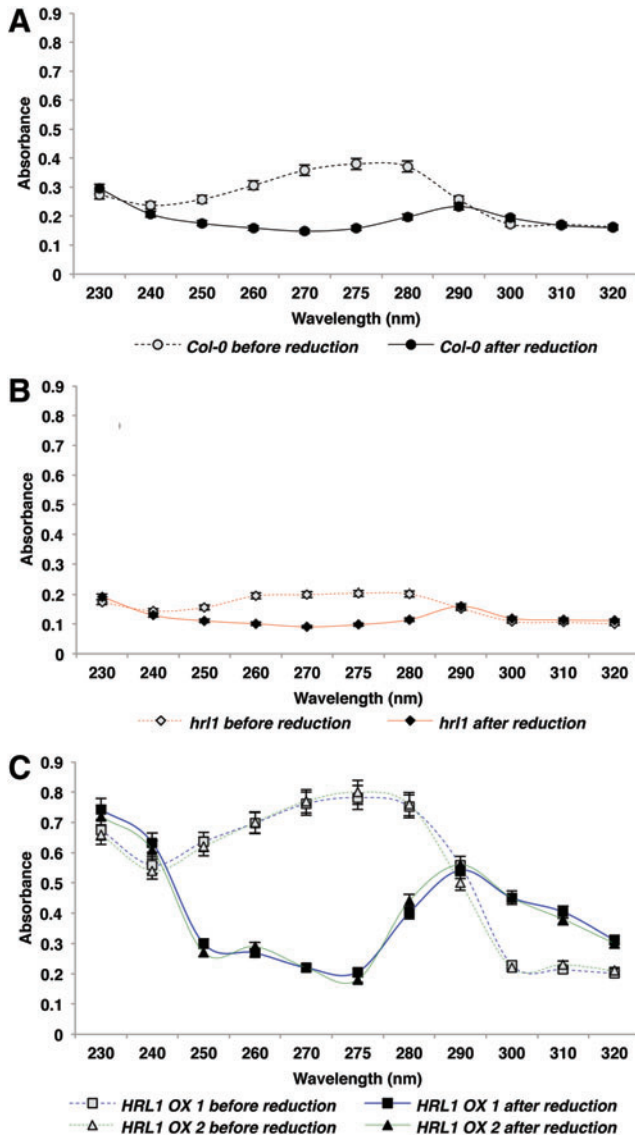

**SUPPLEMENTARY FIG. S2. *HRL1* overexpression leads to higher Coenzyme Q<sub>10</sub> levels.** Absorption spectrum of lipid extract in ethanol from mitochondrial isolation of wild type Col-O (A), *hrl1* mutant (B), and *HRL1* overexpression (C) plants. Absorption peak at 275 nm corresponds to ubiquinone. Reduction with sodium borohydride shifts peak to 290 nm, which corresponds to ubiquinol. All experiments were repeated at least twice, and similar results were obtained.
